# Supplementary material for: Effect of alkyl chain length on one-electron oxidation of bis(alkyl carboxylic acid) selenides: implication on their antioxidant ability
Source: Royal Society of Chemistry journal article supplement (doi:10.1039/c5ra10355j), 2015-01-01
Supplement: c5ra10355j1.pdf [file c5ra10355j1.pdf]

## Supporting Information

### Effect of alkyl chain length on one-electron oxidation of selenocarboxylic acids: Implication of their antioxidant ability

B. G. Singh,<sup>a\*</sup> S. Nadkarni,<sup>a</sup> V. K. Jain<sup>b</sup> and K. I. Priyadarsini<sup>a</sup>

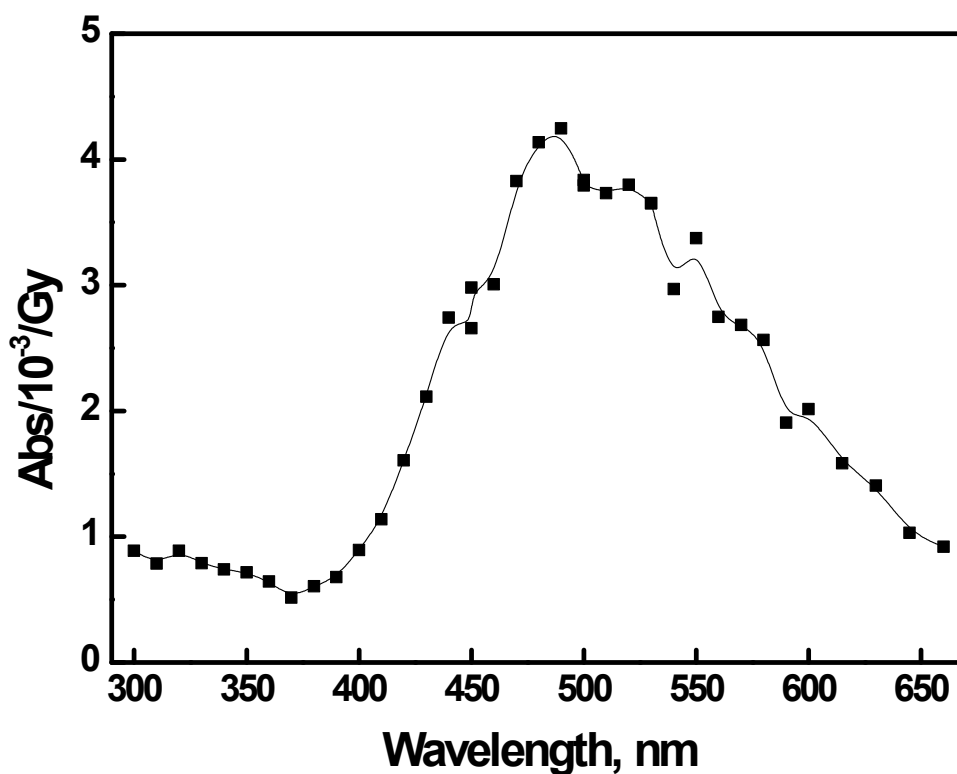

Figure S1: Normalized transient absorption spectrum obtained on pulse radiolysis of N<sub>2</sub>O saturated aqueous solution containing 6 mM SeBA and 0.1 M NaN<sub>3</sub> after 4  $\mu$ s of the pulse at pH

7

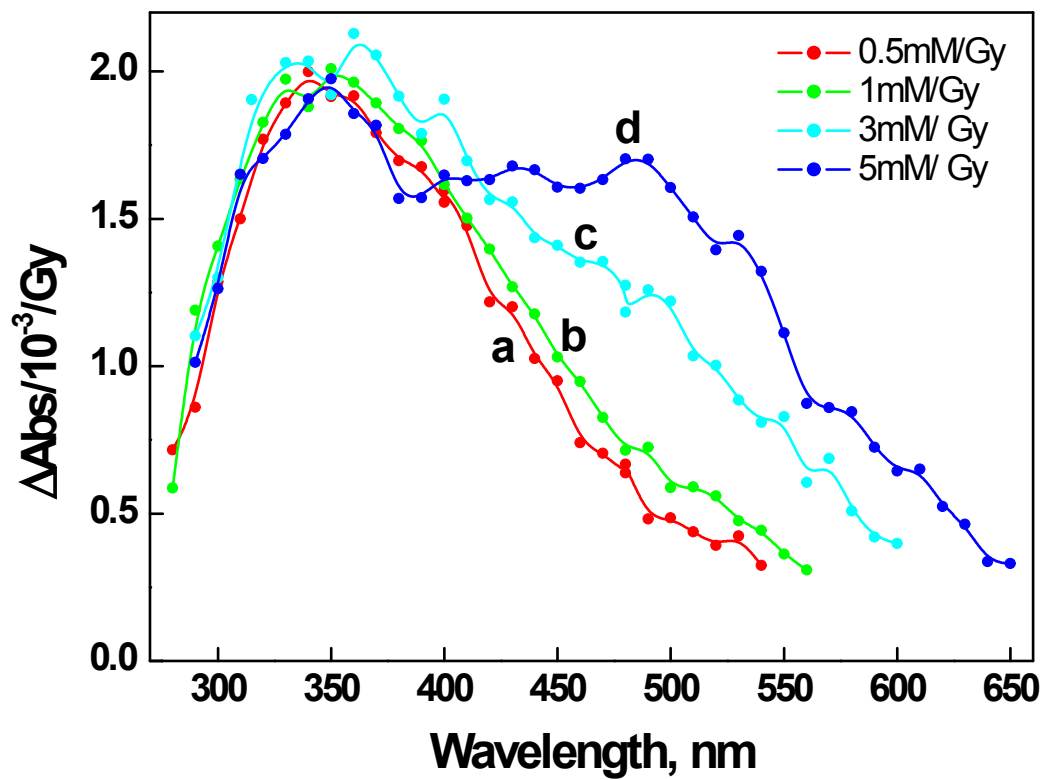

Figure S2: Normalized transient absorption spectra obtained on pulse radiolysis of  $N_2O$  saturated aqueous solution containing (a) = 0.5 mM, (b) = 1 mM, (c) = 3 mM and (d) = 5 mM SePA at pH 7

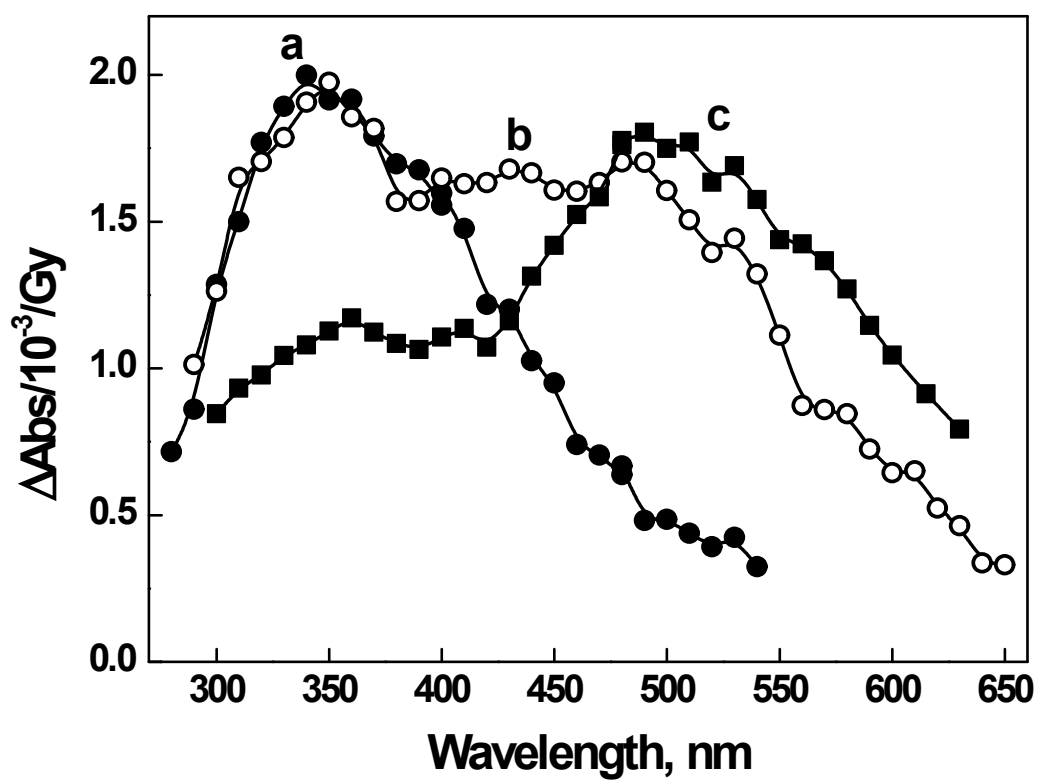

Figure S3: Normalized transient absorption spectra obtained on pulse radiolysis of  $\text{N}_2\text{O}$  saturated aqueous solution of containing (a) = 0.5 mM SePA, (b) = 5 mM SePA, (c) = 6 mM SePA and 0.1 M  $\text{N}_3^-$  at pH 7.

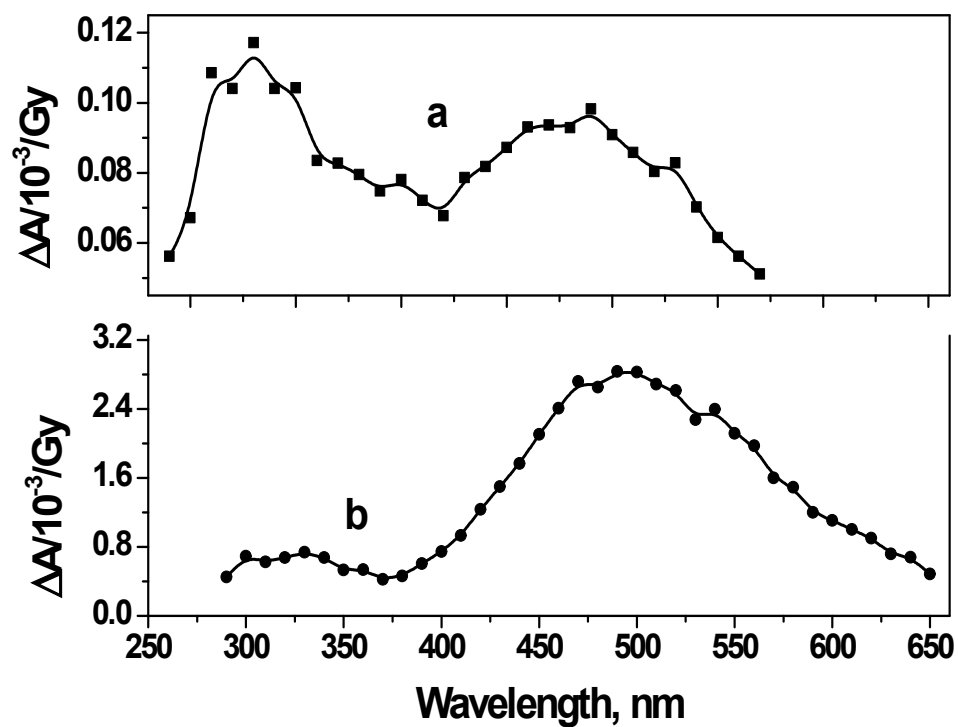

Figure S4: Normalized transient absorption spectra obtained on pulse radiolysis of  $\text{N}_2$  saturated aqueous solution of containing (a) = 0.1 mM SePA, (b) = 5 mM SePA at pH 1.

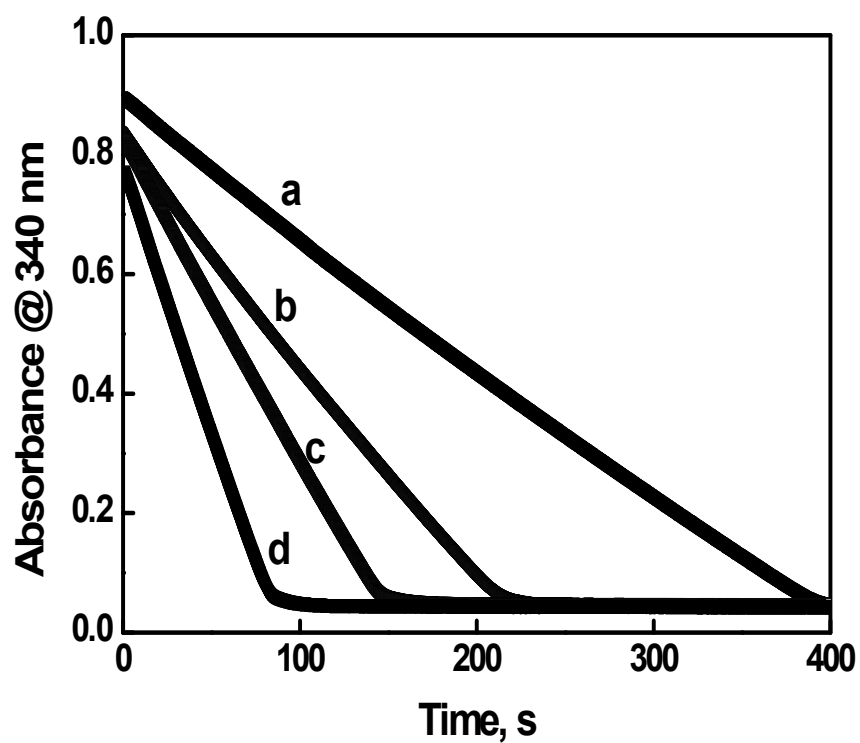

Figure S5: Plots showing change in absorbance at 340 nm as a function of time due to NADPH oxidation in the absence (a) and presence of SeC. [(b) = SeEA; (c) = SePA; (d) SeBA); Experimental condition as mentioned in the experimental section].
